# Supplementary figures and images for: A comparison between oestradiol aptamers as receptors in CNT FET biosensors
Source: Royal Society of Chemistry journal article supplement (doi:10.1039/d3sd00055a), 2023-01-01

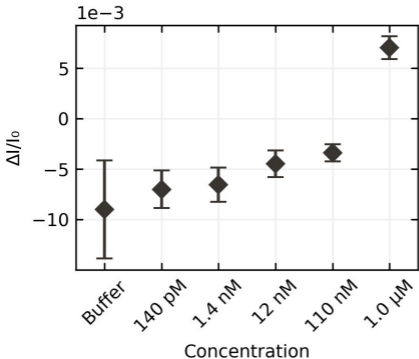

Supplement: d3sd00055a10.pdf [file d3sd00055a10.pdf]

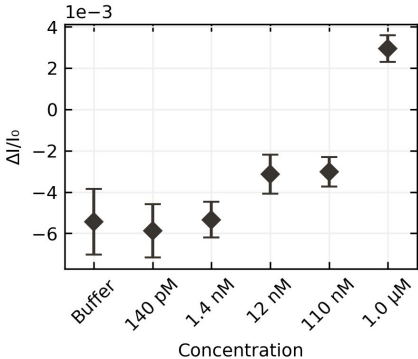

Supplement: d3sd00055a11.pdf [file d3sd00055a11.pdf]

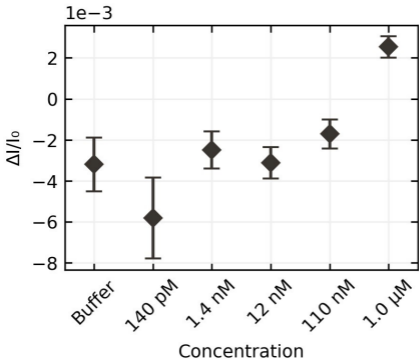

Supplement: d3sd00055a12.pdf [file d3sd00055a12.pdf]

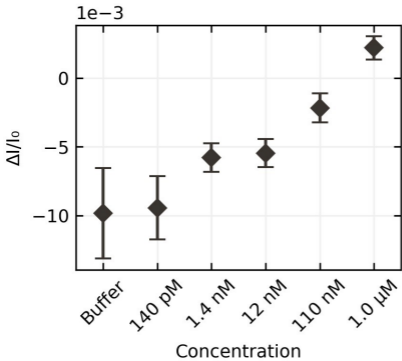

Supplement: d3sd00055a13.pdf [file d3sd00055a13.pdf]

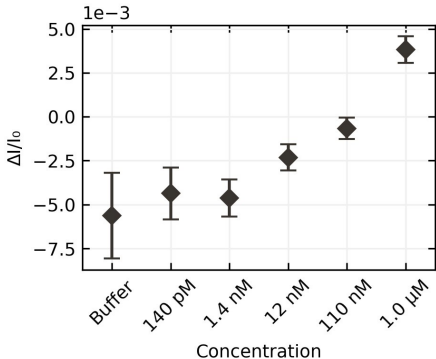

Supplement: d3sd00055a14.pdf [file d3sd00055a14.pdf]

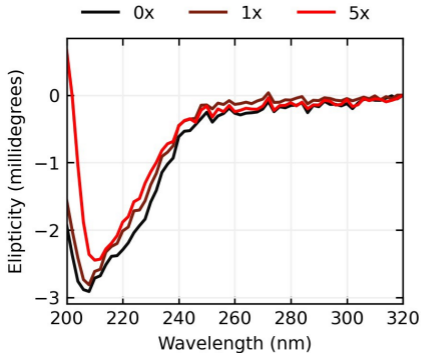

Supplement: d3sd00055a15.pdf [file d3sd00055a15.pdf]

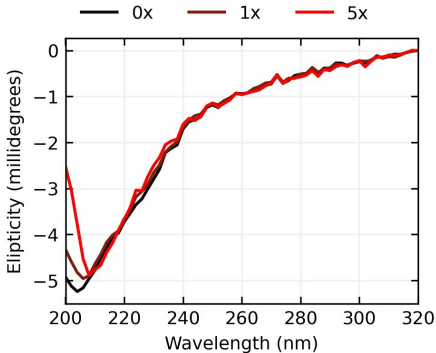

Supplement: d3sd00055a16.pdf [file d3sd00055a16.pdf]

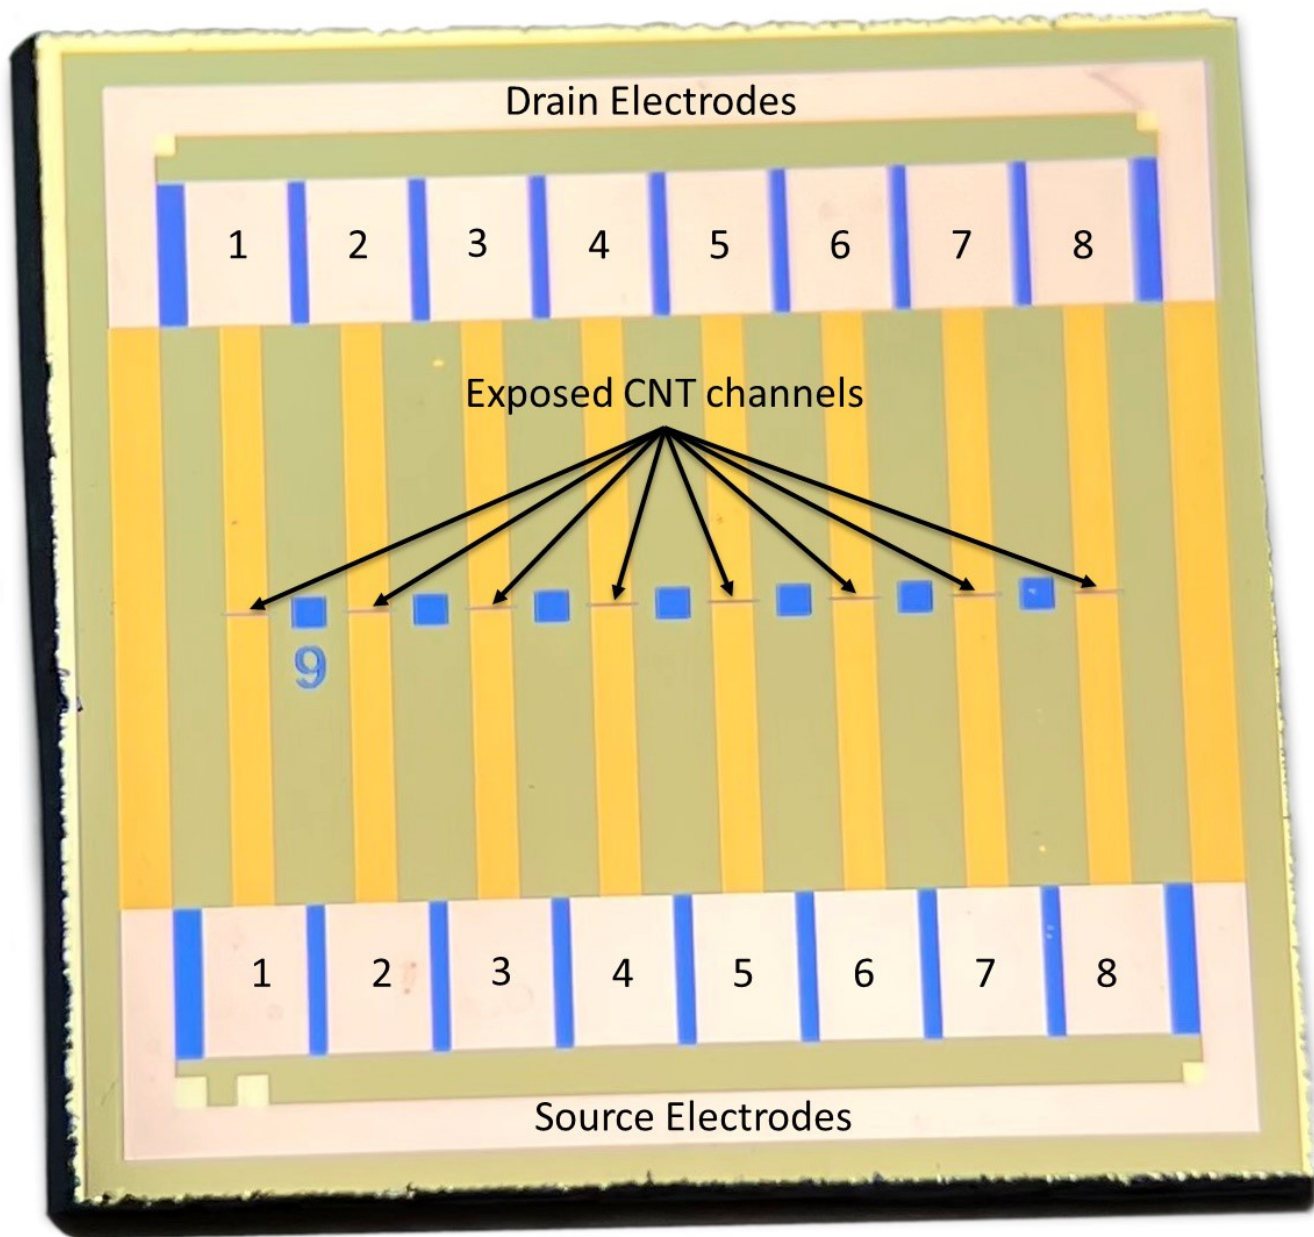

Supplement: d3sd00055a17.pdf [file d3sd00055a17.pdf]

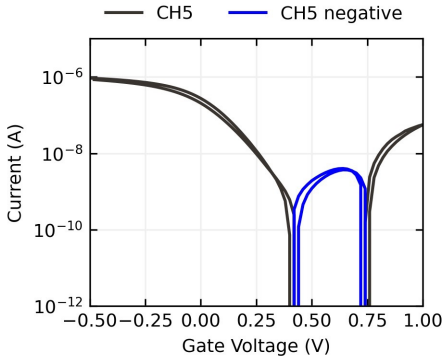

Supplement: d3sd00055a18.pdf [file d3sd00055a18.pdf]

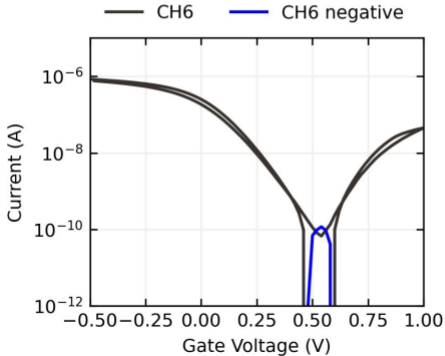

Supplement: d3sd00055a19.pdf [file d3sd00055a19.pdf]

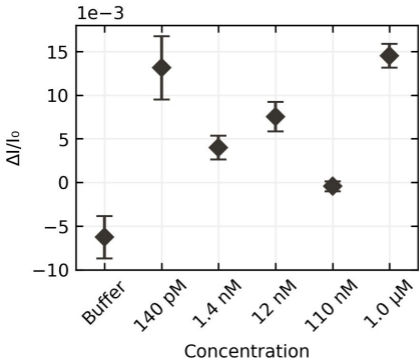

Supplement: d3sd00055a2.pdf [file d3sd00055a2.pdf]

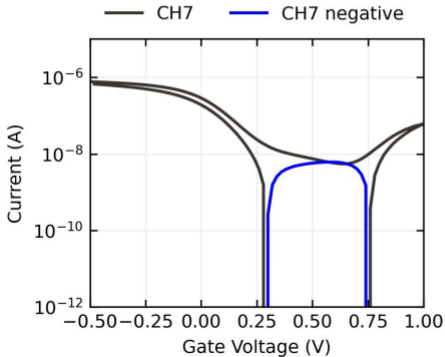

Supplement: d3sd00055a20.pdf [file d3sd00055a20.pdf]

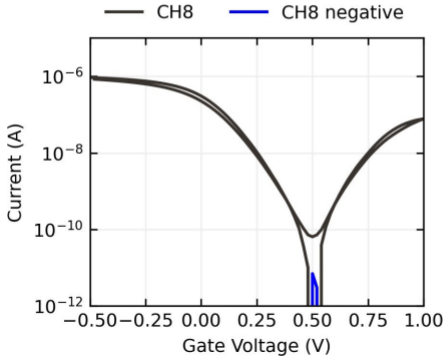

Supplement: d3sd00055a21.pdf [file d3sd00055a21.pdf]

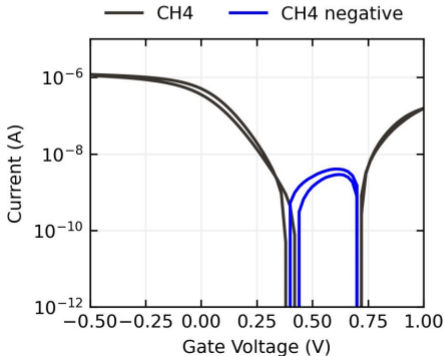

Supplement: d3sd00055a22.pdf [file d3sd00055a22.pdf]

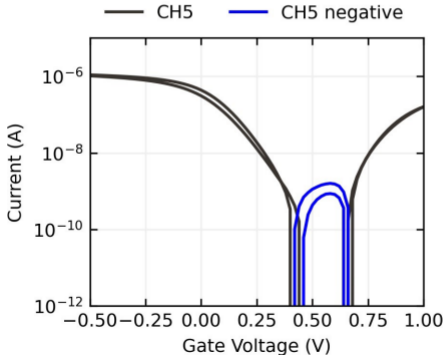

Supplement: d3sd00055a23.pdf [file d3sd00055a23.pdf]

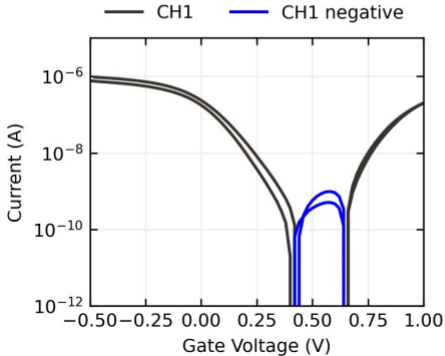

Supplement: d3sd00055a24.pdf [file d3sd00055a24.pdf]

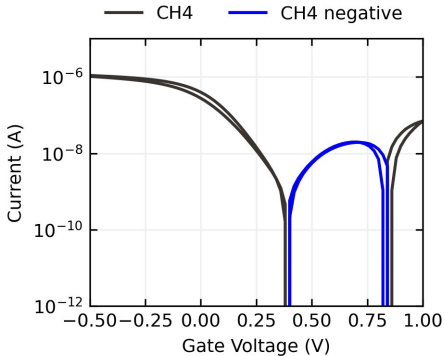

Supplement: d3sd00055a25.pdf [file d3sd00055a25.pdf]

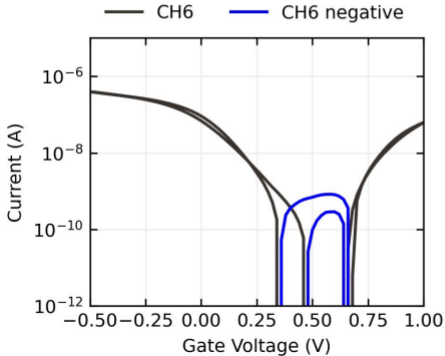

Supplement: d3sd00055a26.pdf [file d3sd00055a26.pdf]

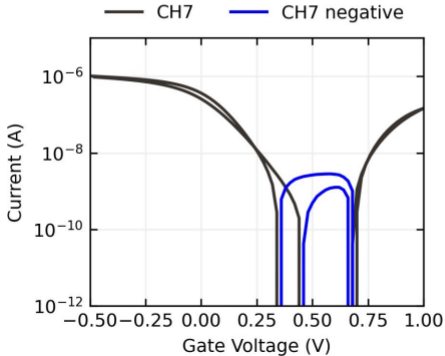

Supplement: d3sd00055a27.pdf [file d3sd00055a27.pdf]

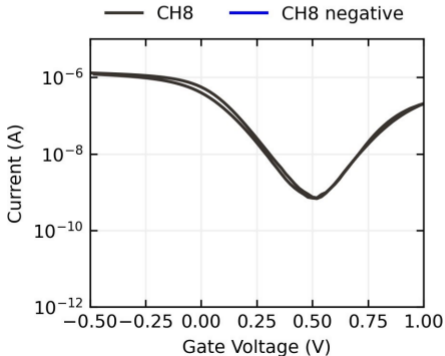

Supplement: d3sd00055a28.pdf [file d3sd00055a28.pdf]

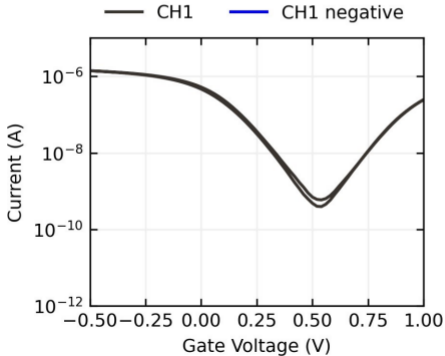

Supplement: d3sd00055a29.pdf [file d3sd00055a29.pdf]

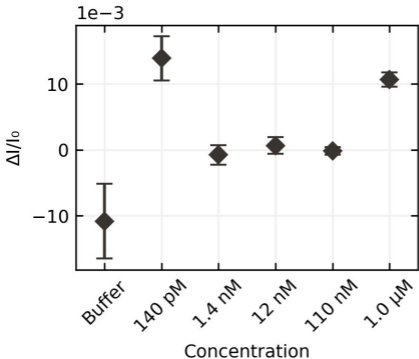

Supplement: d3sd00055a3.pdf [file d3sd00055a3.pdf]

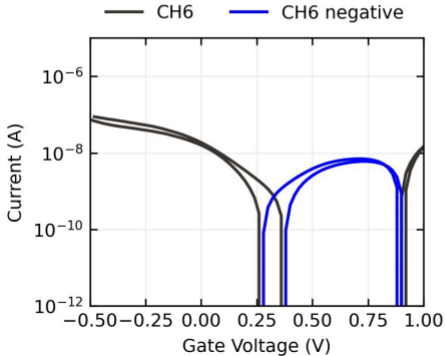

Supplement: d3sd00055a30.pdf [file d3sd00055a30.pdf]

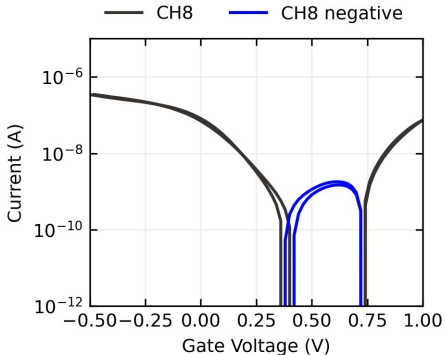

Supplement: d3sd00055a31.pdf [file d3sd00055a31.pdf]

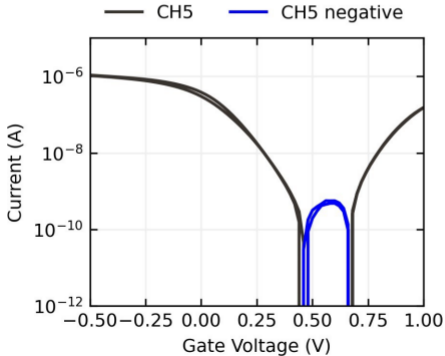

Supplement: d3sd00055a32.pdf [file d3sd00055a32.pdf]

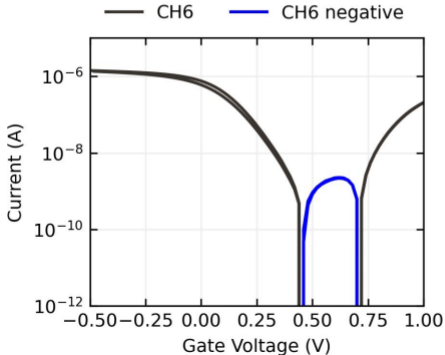

Supplement: d3sd00055a33.pdf [file d3sd00055a33.pdf]

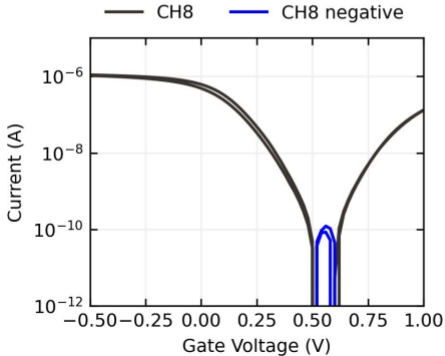

Supplement: d3sd00055a34.pdf [file d3sd00055a34.pdf]

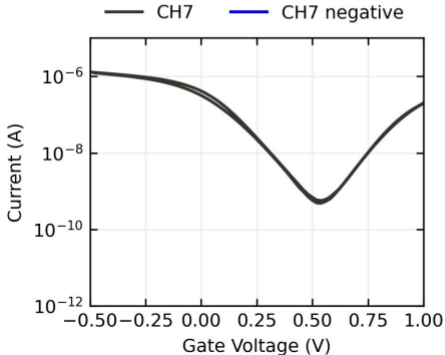

Supplement: d3sd00055a35.pdf [file d3sd00055a35.pdf]

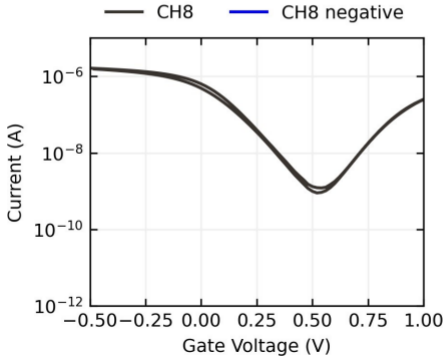

Supplement: d3sd00055a36.pdf [file d3sd00055a36.pdf]

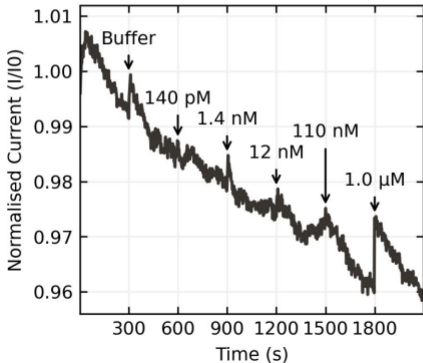

Supplement: d3sd00055a37.pdf [file d3sd00055a37.pdf]

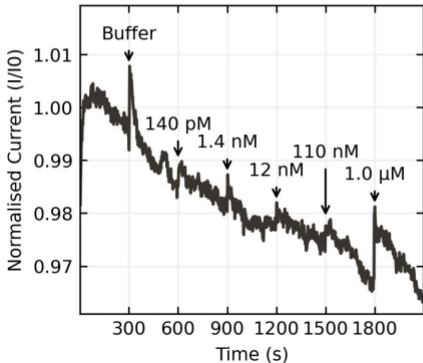

Supplement: d3sd00055a38.pdf [file d3sd00055a38.pdf]

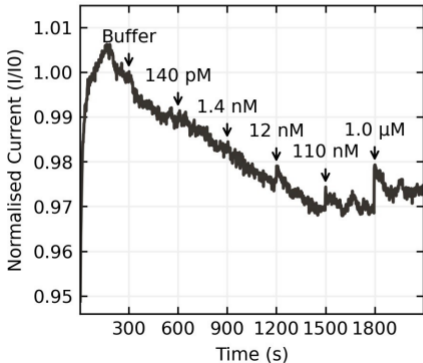

Supplement: d3sd00055a39.pdf [file d3sd00055a39.pdf]

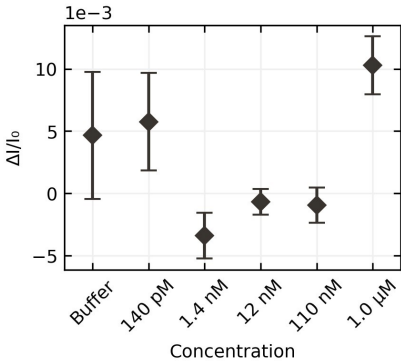

Supplement: d3sd00055a4.pdf [file d3sd00055a4.pdf]

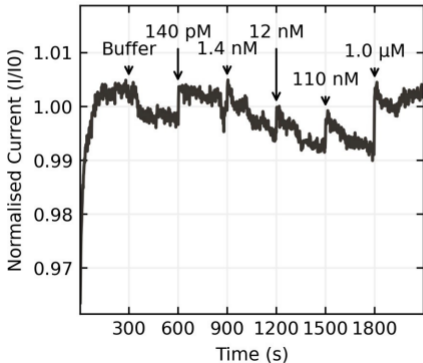

Supplement: d3sd00055a40.pdf [file d3sd00055a40.pdf]

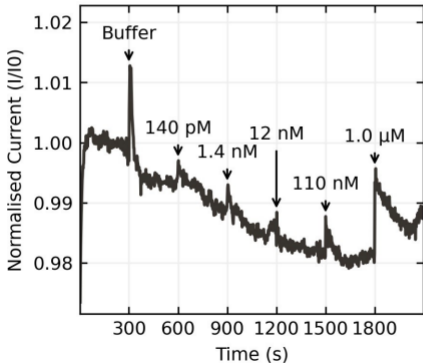

Supplement: d3sd00055a41.pdf [file d3sd00055a41.pdf]

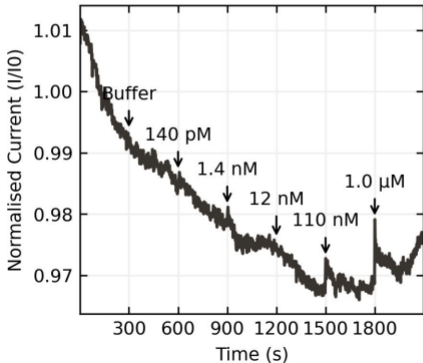

Supplement: d3sd00055a42.pdf [file d3sd00055a42.pdf]

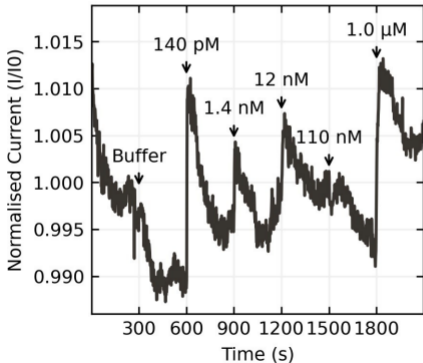

Supplement: d3sd00055a43.pdf [file d3sd00055a43.pdf]

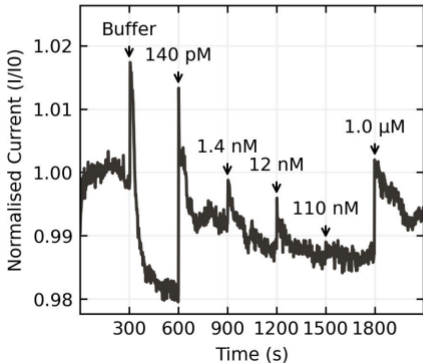

Supplement: d3sd00055a44.pdf [file d3sd00055a44.pdf]

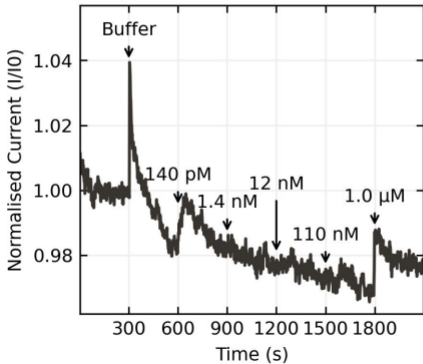

Supplement: d3sd00055a45.pdf [file d3sd00055a45.pdf]

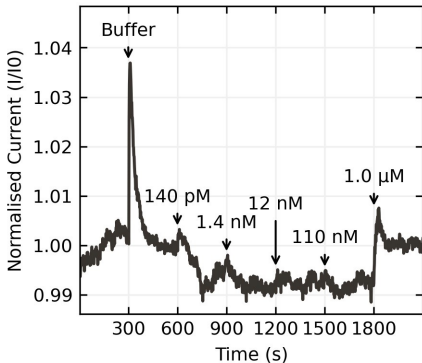

Supplement: d3sd00055a46.pdf [file d3sd00055a46.pdf]

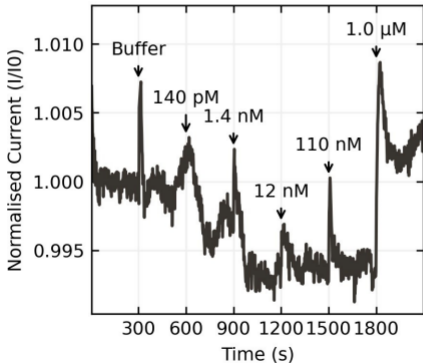

Supplement: d3sd00055a47.pdf [file d3sd00055a47.pdf]

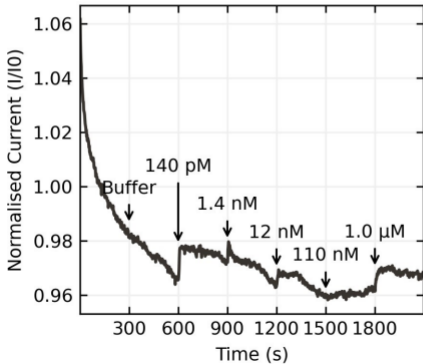

Supplement: d3sd00055a48.pdf [file d3sd00055a48.pdf]

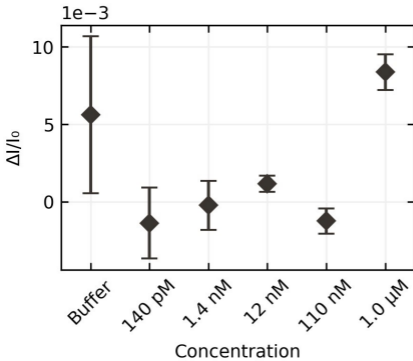

Supplement: d3sd00055a5.pdf [file d3sd00055a5.pdf]

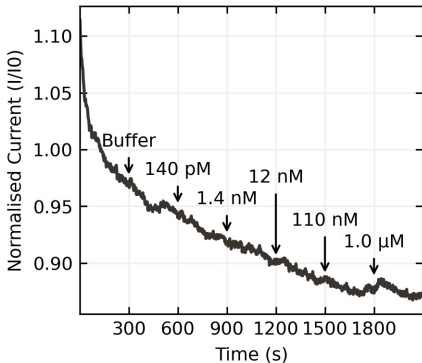

Supplement: d3sd00055a50.pdf [file d3sd00055a50.pdf]

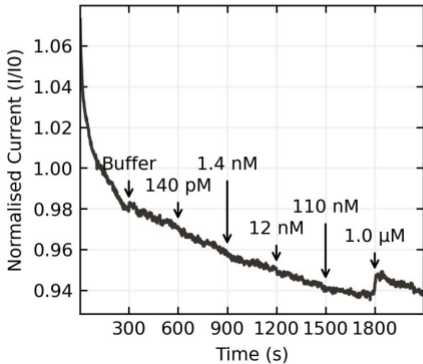

Supplement: d3sd00055a51.pdf [file d3sd00055a51.pdf]

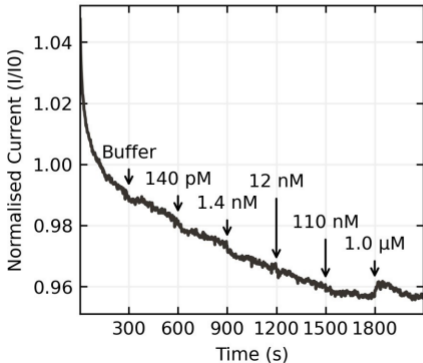

Supplement: d3sd00055a52.pdf [file d3sd00055a52.pdf]

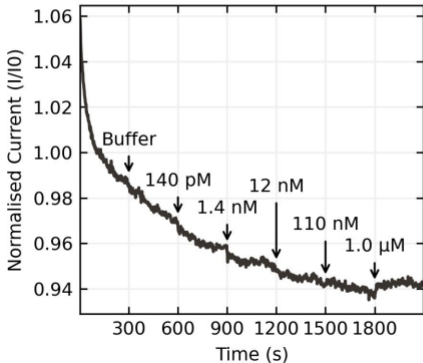

Supplement: d3sd00055a54.pdf [file d3sd00055a54.pdf]

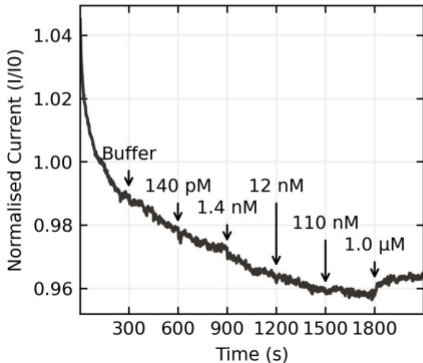

Supplement: d3sd00055a55.pdf [file d3sd00055a55.pdf]

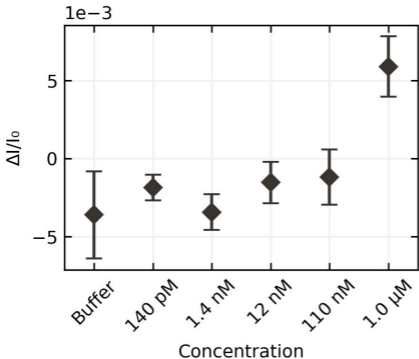

Supplement: d3sd00055a56.pdf [file d3sd00055a56.pdf]

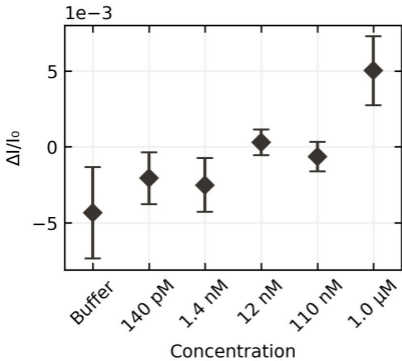

Supplement: d3sd00055a57.pdf [file d3sd00055a57.pdf]

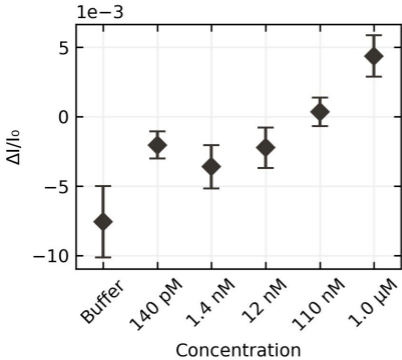

Supplement: d3sd00055a58.pdf [file d3sd00055a58.pdf]

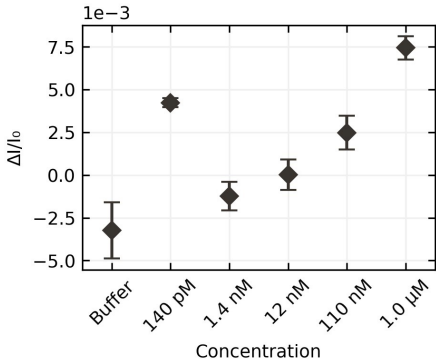

Supplement: d3sd00055a59.pdf [file d3sd00055a59.pdf]

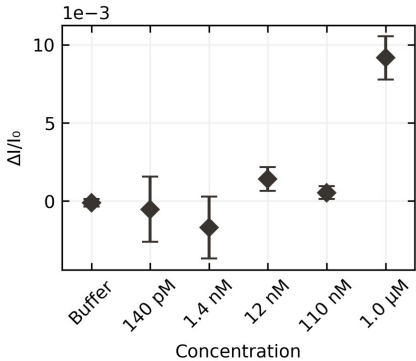

Supplement: d3sd00055a6.pdf [file d3sd00055a6.pdf]

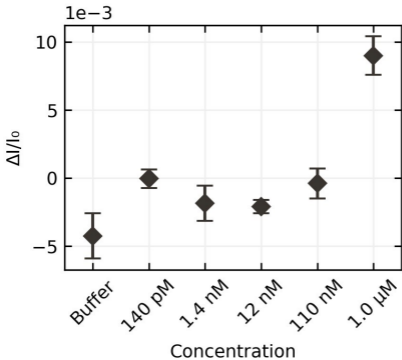

Supplement: d3sd00055a60.pdf [file d3sd00055a60.pdf]

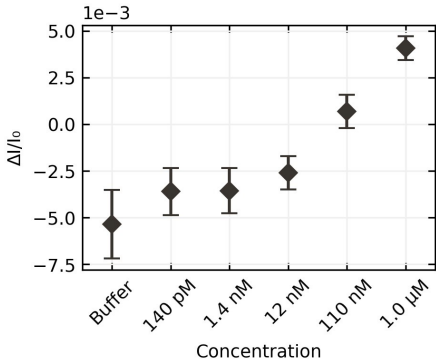

Supplement: d3sd00055a61.pdf [file d3sd00055a61.pdf]

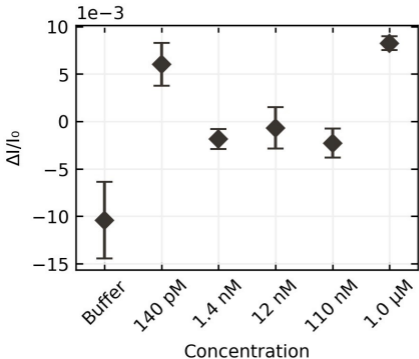

Supplement: d3sd00055a7.pdf [file d3sd00055a7.pdf]

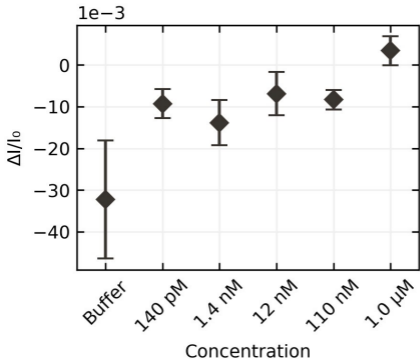

Supplement: d3sd00055a8.pdf [file d3sd00055a8.pdf]

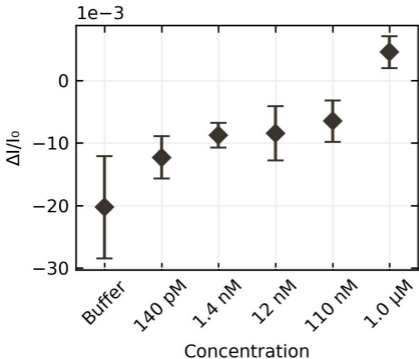

Supplement: d3sd00055a9.pdf [file d3sd00055a9.pdf]
